# Supplementary material
Source: ML conference proceedings conference paper supplement (https://proceedings.mlr.press/v89/liang19b.html)
Supplement: Supplementary file [file liang19b-supp.pdf]

## A Technical Proofs

*Proof of Theorem 1.* Define the line interpolation between two points,

$$\begin{aligned}\theta(x) &= x\theta_t + (1-x)\theta_* , \\ \omega(x) &= x\omega_t + (1-x)\omega_* .\end{aligned}$$

Then the SGA dynamics can be written as (using Taylor's theorem with remainder)

$$\begin{aligned}\begin{bmatrix} \theta_{t+1} - \theta_* \\ \omega_{t+1} - \omega_* \end{bmatrix} &= \begin{bmatrix} \theta_t - \theta_* \\ \omega_t - \omega_* \end{bmatrix} - \eta \begin{bmatrix} \nabla_{\theta} U(\theta_t, \omega_t) \\ -\nabla_{\omega} U(\theta_t, \omega_t) \end{bmatrix} , \\ &= \begin{bmatrix} \theta_t - \theta_* \\ \omega_t - \omega_* \end{bmatrix} - \eta \int_0^1 \begin{bmatrix} \nabla_{\theta\theta} U(\theta(x), \omega(x)) & \nabla_{\theta\omega} U(\theta(x), \omega(x)) \\ -\nabla_{\omega\theta} U(\theta(x), \omega(x)) & -\nabla_{\omega\omega} U(\theta(x), \omega(x)) \end{bmatrix} dx \cdot \begin{bmatrix} \theta_t - \theta_* \\ \omega_t - \omega_* \end{bmatrix} , \\ &= \int_0^1 \left( I - \eta \begin{bmatrix} \nabla_{\theta\theta} U(\theta(x), \omega(x)) & \nabla_{\theta\omega} U(\theta(x), \omega(x)) \\ -\nabla_{\omega\theta} U(\theta(x), \omega(x)) & -\nabla_{\omega\omega} U(\theta(x), \omega(x)) \end{bmatrix} \right) dx \cdot \begin{bmatrix} \theta_t - \theta_* \\ \omega_t - \omega_* \end{bmatrix} .\end{aligned}$$

Assume that one can prove for some  $r > 0$ , and  $(\theta, \omega) \in B_2((\theta_*, \omega_*), r)$ , with a proper choice of  $\eta$ , the largest singular value is bounded above by 1,

$$\left\| I - \eta \begin{bmatrix} \nabla_{\theta\theta} U(\theta, \omega) & \nabla_{\theta\omega} U(\theta, \omega) \\ -\nabla_{\omega\theta} U(\theta, \omega) & -\nabla_{\omega\omega} U(\theta, \omega) \end{bmatrix} \right\|_{\text{op}} < 1 .$$

Then due to convexity of the operator norm, the dynamics of SGA is contracting locally because,

$$\begin{aligned}\left\| \begin{bmatrix} \theta_{t+1} - \theta_* \\ \omega_{t+1} - \omega_* \end{bmatrix} \right\| &\leq \left\| \int_0^1 \left( I - \eta \begin{bmatrix} \nabla_{\theta\theta} U(\theta(x), \omega(x)) & \nabla_{\theta\omega} U(\theta(x), \omega(x)) \\ -\nabla_{\omega\theta} U(\theta(x), \omega(x)) & -\nabla_{\omega\omega} U(\theta(x), \omega(x)) \end{bmatrix} \right) dx \right\|_{\text{op}} \cdot \left\| \begin{bmatrix} \theta_t - \theta_* \\ \omega_t - \omega_* \end{bmatrix} \right\| , \\ &\leq \int_0^1 \left\| \left( I - \eta \begin{bmatrix} \nabla_{\theta\theta} U(\theta(x), \omega(x)) & \nabla_{\theta\omega} U(\theta(x), \omega(x)) \\ -\nabla_{\omega\theta} U(\theta(x), \omega(x)) & -\nabla_{\omega\omega} U(\theta(x), \omega(x)) \end{bmatrix} \right) \right\|_{\text{op}} dx \cdot \left\| \begin{bmatrix} \theta_t - \theta_* \\ \omega_t - \omega_* \end{bmatrix} \right\| , \\ &< \left\| \begin{bmatrix} \theta_t - \theta_* \\ \omega_t - \omega_* \end{bmatrix} \right\| .\end{aligned}$$

Let's analyze the singular values of

$$I - \eta \begin{bmatrix} \nabla_{\theta\theta} U(\theta, \omega) & \nabla_{\theta\omega} U(\theta, \omega) \\ -\nabla_{\omega\theta} U(\theta, \omega) & -\nabla_{\omega\omega} U(\theta, \omega) \end{bmatrix} ,$$

assuming  $\nabla_{\theta\theta} U(\theta, \omega) > 0$ ,  $-\nabla_{\omega\omega} U(\theta, \omega) > 0$ . Abbreviate

$$\begin{bmatrix} \nabla_{\theta\theta} U(\theta, \omega) & \nabla_{\theta\omega} U(\theta, \omega) \\ -\nabla_{\omega\theta} U(\theta, \omega) & -\nabla_{\omega\omega} U(\theta, \omega) \end{bmatrix} := \begin{bmatrix} A & C \\ -C^T & B \end{bmatrix} .$$

The largest singular value of

$$I - \eta \begin{bmatrix} A & C \\ -C^T & B \end{bmatrix} ,$$

is the square root of the largest eigenvalue of the following symmetric matrix

$$\begin{bmatrix} I - \eta A & -\eta C \\ \eta C^T & I - \eta B \end{bmatrix} \begin{bmatrix} I - \eta A & \eta C \\ -\eta C^T & I - \eta B \end{bmatrix} = \begin{bmatrix} (I - \eta A)^2 + \eta^2 C C^T & -\eta^2 (AC - CB) \\ -\eta^2 (C^T A - BC^T) & (I - \eta B)^2 + \eta^2 C^T C \end{bmatrix} .$$

It is clear that when  $\eta = 0$ , the largest eigenvalue of the above matrix is 1. Observe

$$\begin{aligned}&\begin{bmatrix} (I - \eta A)^2 + \eta^2 C C^T & -\eta^2 (AC - CB) \\ -\eta^2 (C^T A - BC^T) & (I - \eta B)^2 + \eta^2 C^T C \end{bmatrix} = I - 2\eta \begin{bmatrix} A & 0 \\ 0 & B \end{bmatrix} + \eta^2 \begin{bmatrix} A^2 + C C^T & -AC + CB \\ -C^T A + BC^T & B^2 + C^T C \end{bmatrix} , \\ &< \left[ 1 - 2\eta \lambda_{\min} \left( \begin{bmatrix} A & 0 \\ 0 & B \end{bmatrix} \right) + \eta^2 \lambda_{\max} \left( \begin{bmatrix} A^2 + C C^T & -AC + CB \\ -C^T A + BC^T & B^2 + C^T C \end{bmatrix} \right) \right] I .\end{aligned}$$

If we choose  $\eta$  to be

$$\eta = \frac{\min_{(\theta, \omega) \in B_2((\theta_*, \omega_*), r)} \lambda_{\min} \left( \begin{bmatrix} A_{\theta, \omega} & 0 \\ 0 & B_{\theta, \omega} \end{bmatrix} \right)}{\max_{(\theta, \omega) \in B_2((\theta_*, \omega_*), r)} \lambda_{\max} \left( \begin{bmatrix} A_{\theta, \omega}^2 + C_{\theta, \omega} C_{\theta, \omega}^T & -A_{\theta, \omega} C_{\theta, \omega} + C_{\theta, \omega} B_{\theta, \omega} \\ -C_{\theta, \omega}^T A_{\theta, \omega} + B_{\theta, \omega} C_{\theta, \omega}^T & B_{\theta, \omega}^2 + C_{\theta, \omega}^T C_{\theta, \omega} \end{bmatrix} \right)} = \frac{\sqrt{\alpha}}{\beta},$$

then we find

$$\begin{bmatrix} (I - \eta A)^2 + \eta^2 C C^T & -\eta^2 (A C - C B) \\ -\eta^2 (C^T A - B C^T) & (I - \eta B)^2 + \eta^2 C^T C \end{bmatrix} < \left(1 - \frac{\alpha}{\beta}\right) I.$$

In this case,

$$\begin{aligned} \left\| \begin{bmatrix} \theta_{t+1} - \theta_* \\ \omega_{t+1} - \omega_* \end{bmatrix} \right\| &\leq \sup_{(\theta, \omega) \in B_2((\theta_*, \omega_*), r)} \left\| I - \eta \begin{bmatrix} \nabla_{\theta\theta} U(\theta, \omega) & \nabla_{\theta\omega} U(\theta, \omega) \\ -\nabla_{\omega\theta} U(\theta, \omega) & -\nabla_{\omega\omega} U(\theta, \omega) \end{bmatrix} \right\|_{\text{op}} \left\| \begin{bmatrix} \theta_t - \theta_* \\ \omega_t - \omega_* \end{bmatrix} \right\|, \\ &\leq \sqrt{1 - \frac{\alpha}{\beta}} \cdot \left\| \begin{bmatrix} \theta_t - \theta_* \\ \omega_t - \omega_* \end{bmatrix} \right\|. \end{aligned}$$

Therefore, to obtain an  $\epsilon$ -minimizer one requires a number of steps equal to

$$2 \frac{\beta}{\alpha} \log \frac{r}{\epsilon}.$$

□

*Proof of Remark 1.* Consider  $U(\theta) = \frac{1}{2} \theta^T A \theta$  where  $A > 0$  is strictly positive. Then gradient descent corresponds to  $\theta_{t+1} = (I - \eta A) \theta_t$  and thus  $\|\theta_{t+1}\| \leq \|I - \eta A\|_{\text{op}} \|\theta_t\|$ . Setting  $\eta = 1/\lambda_{\max}(A)$  we have  $I - \eta A \geq 0$  so  $\|I - \eta A\|_{\text{op}} = \lambda_{\max}(I - \eta A) = 1 - \lambda_{\min}(A)/\lambda_{\max}(A)$ . Therefore  $\|\theta_t\| \leq \|\theta_0\| [1 - \lambda_{\min}(A)/\lambda_{\max}(A)]^t \leq \|\theta_0\| e^{-t \lambda_{\min}(A)/\lambda_{\max}(A)}$ . The number of iterations required to obtain an  $\epsilon$ -minimizer is thus bounded as  $T \geq \frac{\lambda_{\max}(A)}{\lambda_{\min}(A)} \log \frac{r}{\epsilon}$ .

□

*Proof of Corollary 1.* We have

$$\begin{aligned} \begin{bmatrix} \theta_{t+1} \\ \omega_{t+1} \end{bmatrix} &= \begin{bmatrix} \theta_t \\ \omega_t \end{bmatrix} - \eta \begin{bmatrix} \nabla_{\theta} U(\theta_t, \omega_t) \\ -\nabla_{\omega} U(\theta_t, \omega_t) \end{bmatrix}, \\ &= \left( I - \eta \begin{bmatrix} I & C \\ -C^T & I \end{bmatrix} \right) \cdot \begin{bmatrix} \theta_t \\ \omega_t \end{bmatrix}. \end{aligned}$$

If we define  $D = \text{diag}((1 - \eta)^2 I + \eta^2 C C^T, (1 - \eta)^2 I + \eta^2 C^T C)$  then using the Rayleigh quotient representation of  $\lambda_{\min}(D)$  we obtain,

$$\left\| \begin{bmatrix} \theta_{t+1} \\ \omega_{t+1} \end{bmatrix} \right\|^2 = \begin{bmatrix} \theta_t & \omega_t \end{bmatrix} D \begin{bmatrix} \theta_t \\ \omega_t \end{bmatrix} \geq \lambda_{\min}(D) \left\| \begin{bmatrix} \theta_t \\ \omega_t \end{bmatrix} \right\|^2.$$

On the other hand,

$$\lambda_{\min}(D) = \lambda_{\min}((1 - \eta)^2 I + \eta^2 C C^T) = 1 - 2\eta + [1 + \lambda_{\min}(C C^T)] \eta^2 \geq \frac{\lambda_{\min}(C C^T)}{1 + \lambda_{\min}(C C^T)}$$

regardless of the choice of  $\eta$ , which proves the claim.

□

*Proof of Theorem 3.* Recall that the OMD dynamics iteratively updates

$$\begin{bmatrix} \theta_{t+1} \\ \omega_{t+1} \end{bmatrix} = \left( I - 2\eta \begin{bmatrix} 0 & C \\ -C^T & 0 \end{bmatrix} \right) \cdot \begin{bmatrix} \theta_t \\ \omega_t \end{bmatrix} + \eta \begin{bmatrix} 0 & C \\ -C^T & 0 \end{bmatrix} \cdot \begin{bmatrix} \theta_{t-1} \\ \omega_{t-1} \end{bmatrix}.$$

Define the following matrices

$$R_1 = \frac{\left( I - 2\eta \begin{bmatrix} 0 & C \\ -C^T & 0 \end{bmatrix} \right) + \left( I - 4\eta^2 \begin{bmatrix} CC^T & 0 \\ 0 & C^T C \end{bmatrix} \right)^{1/2}}{2}, \quad (11)$$

$$R_2 = \frac{\left( I - 2\eta \begin{bmatrix} 0 & C \\ -C^T & 0 \end{bmatrix} \right) - \left( I - 4\eta^2 \begin{bmatrix} CC^T & 0 \\ 0 & C^T C \end{bmatrix} \right)^{1/2}}{2}. \quad (12)$$

It is easy to verify that

$$\begin{aligned} R_1 + R_2 &= \left( I - 2\eta \begin{bmatrix} 0 & C \\ -C^T & 0 \end{bmatrix} \right), \\ R_1 R_2 = R_2 R_1 &= \frac{\left( I - 2\eta \begin{bmatrix} 0 & C \\ -C^T & 0 \end{bmatrix} \right)^2 - \left( I - 4\eta^2 \begin{bmatrix} CC^T & 0 \\ 0 & C^T C \end{bmatrix} \right)}{4} = -\eta \begin{bmatrix} 0 & C \\ -C^T & 0 \end{bmatrix}. \end{aligned}$$

The commutative property  $R_1 R_2 = R_2 R_1$  follows from a singular value decomposition argument: Letting  $C = UDV^T$  be the SVD of  $C$  ( $D$  diagonal) one finds,

$$C(I - 4\eta^2 C^T C)^{1/2} = UD(I - 4\eta^2 D^2)^{1/2} V^T = U(I - 4\eta^2 D^2)^{1/2} DV^T = (I - 4\eta^2 CC^T)^{1/2} C.$$

Using the above equality, the commutative property follows

$$\begin{aligned} \left( I - 2\eta \begin{bmatrix} 0 & C \\ -C^T & 0 \end{bmatrix} \right) \left( I - 4\eta^2 \begin{bmatrix} CC^T & 0 \\ 0 & C^T C \end{bmatrix} \right)^{1/2} &= \left( I - 4\eta^2 \begin{bmatrix} CC^T & 0 \\ 0 & C^T C \end{bmatrix} \right)^{1/2} \left( I - 2\eta \begin{bmatrix} 0 & C \\ -C^T & 0 \end{bmatrix} \right), \\ \implies R_1 R_2 = R_2 R_1. \end{aligned}$$

Now we have the following relations for OMD,

$$\begin{aligned} \begin{bmatrix} \theta_{t+1} \\ \omega_{t+1} \end{bmatrix} - R_1 \begin{bmatrix} \theta_t \\ \omega_t \end{bmatrix} &= R_2 \left( \begin{bmatrix} \theta_t \\ \omega_t \end{bmatrix} - R_1 \begin{bmatrix} \theta_{t-1} \\ \omega_{t-1} \end{bmatrix} \right), \\ \begin{bmatrix} \theta_{t+1} \\ \omega_{t+1} \end{bmatrix} - R_2 \begin{bmatrix} \theta_t \\ \omega_t \end{bmatrix} &= R_1 \left( \begin{bmatrix} \theta_t \\ \omega_t \end{bmatrix} - R_2 \begin{bmatrix} \theta_{t-1} \\ \omega_{t-1} \end{bmatrix} \right). \end{aligned}$$

Hence

$$(R_1 - R_2) \begin{bmatrix} \theta_t \\ \omega_t \end{bmatrix} = R_1^t \left( \begin{bmatrix} \theta_1 \\ \omega_1 \end{bmatrix} - R_2 \begin{bmatrix} \theta_0 \\ \omega_0 \end{bmatrix} \right) - R_2^t \left( \begin{bmatrix} \theta_1 \\ \omega_1 \end{bmatrix} - R_1 \begin{bmatrix} \theta_0 \\ \omega_0 \end{bmatrix} \right). \quad (13)$$

Let's analyze the singular values of  $R_1$  and  $R_2$ . We have,

$$\begin{aligned} R_1 &= \frac{\left( I - 2\eta \begin{bmatrix} 0 & C \\ -C^T & 0 \end{bmatrix} \right) + \left( I - 4\eta^2 \begin{bmatrix} CC^T & 0 \\ 0 & C^T C \end{bmatrix} \right)^{1/2}}{2}, \\ &= \begin{bmatrix} \frac{I + (I - 4\eta^2 CC^T)^{1/2}}{2} & -\eta C \\ \eta C^T & \frac{I + (I - 4\eta^2 C^T C)^{1/2}}{2} \end{bmatrix}, \\ R_1 R_1^T &= \begin{bmatrix} \frac{I + (I - 4\eta^2 CC^T)^{1/2}}{2} & -\eta C \\ \eta C^T & \frac{I + (I - 4\eta^2 C^T C)^{1/2}}{2} \end{bmatrix} \begin{bmatrix} \frac{I + (I - 4\eta^2 CC^T)^{1/2}}{2} & \eta C \\ -\eta C^T & \frac{I + (I - 4\eta^2 C^T C)^{1/2}}{2} \end{bmatrix}, \\ &= \begin{bmatrix} \left( \frac{I + (I - 4\eta^2 CC^T)^{1/2}}{2} \right)^2 + \eta^2 CC^T & 0 \\ 0 & \left( \frac{I + (I - 4\eta^2 C^T C)^{1/2}}{2} \right)^2 + \eta^2 C^T C \end{bmatrix}, \\ &= \begin{bmatrix} \frac{I + (I - 4\eta^2 CC^T)^{1/2}}{2} & 0 \\ 0 & \frac{I + (I - 4\eta^2 C^T C)^{1/2}}{2} \end{bmatrix}. \end{aligned}$$

Similarly

$$R_2 R_2^T = \begin{bmatrix} \frac{I - (I - 4\eta^2 CC^T)^{1/2}}{2} & 0 \\ 0 & \frac{I - (I - 4\eta^2 C^T C)^{1/2}}{2} \end{bmatrix} .$$

For  $\eta$  small enough, the spectral radius satisfies the strict inequality  $\|R_1\|_{\text{op}} < 1$ . Concretely, for example,

$$\begin{aligned} \eta = \frac{1}{2\sqrt{2\lambda_{\max}(CC^T)}} &\implies \\ \frac{I + (I - 4\eta^2 CC^T)^{1/2}}{2} &\leq \frac{I + (I - 2\eta^2 CC^T)}{2} = I - \eta^2 CC^T \leq \left[1 - \frac{1}{8} \frac{\lambda_{\min}(CC^T)}{\lambda_{\max}(CC^T)}\right] I , \\ \frac{I - (I - 4\eta^2 CC^T)^{1/2}}{2} &\leq \frac{1}{2} I . \end{aligned}$$

Therefore  $\|R_1\|_{\text{op}} \leq \sqrt{1 - \frac{1}{8} \frac{\lambda_{\min}(CC^T)}{\lambda_{\max}(CC^T)}}$ ,  $\|R_2\|_{\text{op}} \leq \sqrt{1 - \frac{1}{2}}$ .

The RHS of Eqn. (13) is upper bounded because

$$\begin{aligned} \left\| R_2^t \begin{bmatrix} \theta_1 \\ \omega_1 \end{bmatrix} - R_1 \begin{bmatrix} \theta_0 \\ \omega_0 \end{bmatrix} \right\| &\leq \left(1 - \frac{1}{2}\right)^{t/2} (\|(\theta_1, \omega_1)\| + \|(\theta_0, \omega_0)\|) , \\ \left\| R_1^t \begin{bmatrix} \theta_1 \\ \omega_1 \end{bmatrix} - R_2 \begin{bmatrix} \theta_0 \\ \omega_0 \end{bmatrix} \right\| &\leq \left(1 - \frac{1}{8} \frac{\lambda_{\min}(CC^T)}{\lambda_{\max}(CC^T)}\right)^{t/2} (\|(\theta_1, \omega_1)\| + \|(\theta_0, \omega_0)\|) . \end{aligned}$$

Moreover the LHS satisfies

$$\left\| (R_1 - R_2) \begin{bmatrix} \theta_t \\ \omega_t \end{bmatrix} \right\| \geq \left\| \begin{bmatrix} \theta_t \\ \omega_t \end{bmatrix} \right\| \sqrt{\frac{1}{2}} .$$

Combining these inequalities we obtain

$$\|(\theta_t, \omega_t)\| \sqrt{\frac{1}{2}} \leq \left[ \left(1 - \frac{1}{2}\right)^{t/2} + \left(1 - \frac{1}{8} \frac{\lambda_{\min}(CC^T)}{\lambda_{\max}(CC^T)}\right)^{t/2} \right] (\|(\theta_0, \omega_0)\| + \|(\theta_1, \omega_1)\|) . \quad (14)$$

By our assumption  $\|(\theta_0, \omega_0)\|, \|(\theta_1, \omega_1)\| \leq r$  so

$$\|(\theta_t, \omega_t)\| \leq 2\sqrt{2}r \left[ \left(1 - \frac{1}{2}\right)^{t/2} + \left(1 - \frac{1}{8} \frac{\lambda_{\min}(CC^T)}{\lambda_{\max}(CC^T)}\right)^{t/2} \right] , \quad (15)$$

$$\leq 2\sqrt{2}r \left[ \exp\left(-\frac{t}{4}\right) + \exp\left(-\frac{t}{16} \frac{\lambda_{\min}(CC^T)}{\lambda_{\max}(CC^T)}\right) \right] , \quad (16)$$

because  $\forall(x, \alpha) \in \mathbb{R} \times \mathbb{R}^+ : (1 - x)^\alpha \leq e^{-\alpha x}$ . Thus

$$\|(\theta_t, \omega_t)\| \leq 2\sqrt{2}r \exp\left(-\frac{t}{16} \frac{\lambda_{\min}(CC^T)}{\lambda_{\max}(CC^T)}\right) \left[1 + \exp\left(-\frac{t}{4} + \frac{t}{16} \frac{\lambda_{\min}(CC^T)}{\lambda_{\max}(CC^T)}\right)\right] . \quad (17)$$

But  $16 \geq 4 \frac{\lambda_{\min}(CC^T)}{\lambda_{\max}(CC^T)} \implies -\frac{1}{4} + \frac{1}{16} \frac{\lambda_{\min}(CC^T)}{\lambda_{\max}(CC^T)} \leq 0$  so

$$\|(\theta_t, \omega_t)\| \leq 2\sqrt{2}r \exp\left(-\frac{t}{16} \frac{\lambda_{\min}(CC^T)}{\lambda_{\max}(CC^T)}\right) [1 + 1] , \quad (18)$$

$$= 4\sqrt{2}r \exp\left(-\frac{t}{16} \frac{\lambda_{\min}(CC^T)}{\lambda_{\max}(CC^T)}\right) . \quad (19)$$

To sum up, when

$$T \geq \left\lceil 16 \frac{\lambda_{\max}(CC^T)}{\lambda_{\min}(CC^T)} \log \frac{4\sqrt{2}r}{\epsilon} \right\rceil ,$$

one can ensure  $\|(\theta_T, \omega_T)\| \leq \epsilon$ . □

*Proof of Theorem 6.* In this case, the consensus optimization satisfies the following update

$$\begin{bmatrix} \theta_{t+1} \\ \omega_{t+1} \end{bmatrix} = \left( I - \eta \begin{bmatrix} \gamma CC^T & C \\ -C^T & \gamma C^T C \end{bmatrix} \right) \cdot \begin{bmatrix} \theta_t \\ \omega_t \end{bmatrix}. \quad (20)$$

Again let's analyze the singular values of the operator  $K := \left( I - \eta \begin{bmatrix} \gamma CC^T & C \\ -C^T & \gamma C^T C \end{bmatrix} \right)$ , or equivalently, the eigenvalues of  $KK^T$ ,

$$\begin{aligned} KK^T &= \begin{bmatrix} I - \eta\gamma CC^T & -\eta C \\ \eta C^T & I - \eta\gamma C^T C \end{bmatrix} \begin{bmatrix} I - \eta\gamma CC^T & \eta C \\ -\eta C^T & I - \eta\gamma C^T C \end{bmatrix}, \\ &= \begin{bmatrix} (I - \eta\gamma CC^T)^2 + \eta^2 CC^T & (I - \eta\gamma CC^T)\eta C - \eta C(I - \eta\gamma C^T C) \\ \eta C^T(I - \eta\gamma CC^T) - (I - \eta\gamma C^T C)\eta C^T & (I - \eta\gamma C^T C)^2 + \eta^2 C^T C \end{bmatrix}, \\ &= \begin{bmatrix} (I - \eta\gamma CC^T)^2 + \eta^2 CC^T & 0 \\ 0 & (I - \eta\gamma C^T C)^2 + \eta^2 C^T C \end{bmatrix}. \end{aligned}$$

Now consider the largest eigenvalue of  $(I - \eta\gamma CC^T)^2 + \eta^2 CC^T$ , for a fixed  $\gamma$ , with a properly chosen  $\eta$ . Using the SVD  $C = UDV^T$ , we obtain

$$\begin{aligned} (I - \eta\gamma CC^T)^2 + \eta^2 CC^T &= U [(I - \eta\gamma D^2)^2 + \eta^2 D^2] U^T \\ &\leq [1 - 2\gamma\lambda_{\min}(CC^T)\eta + (\gamma^2\lambda_{\max}^2(CC^T) + \lambda_{\max}(CC^T)\eta^2)] I, \\ &= \left[ 1 - \frac{\gamma^2\lambda_{\min}^2(CC^T)}{\gamma^2\lambda_{\max}^2(CC^T) + \lambda_{\max}(CC^T)} \right] I, \end{aligned}$$

with

$$\eta = \frac{\gamma\lambda_{\min}(CC^T)}{\lambda_{\max}(CC^T) + \gamma^2\lambda_{\max}^2(CC^T)}.$$

□

*Proof of Theorem 5.* In this case, the implicit update satisfies the update rule

$$\begin{bmatrix} \theta_{t+1} \\ \omega_{t+1} \end{bmatrix} = \begin{bmatrix} \theta_t \\ \omega_t \end{bmatrix} - \eta \begin{bmatrix} 0 & C \\ -C^T & 0 \end{bmatrix} \cdot \begin{bmatrix} \theta_{t+1} \\ \omega_{t+1} \end{bmatrix} \quad (21)$$

$$\left( I + \eta \begin{bmatrix} 0 & C \\ -C^T & 0 \end{bmatrix} \right) \cdot \begin{bmatrix} \theta_{t+1} \\ \omega_{t+1} \end{bmatrix} = \begin{bmatrix} \theta_t \\ \omega_t \end{bmatrix}. \quad (22)$$

Let's analyze the singular values of the matrix  $K := \left( I + \eta \begin{bmatrix} 0 & C \\ -C^T & 0 \end{bmatrix} \right)$ , or equivalently the root of eigenvalues of  $KK^T$

$$\begin{aligned} KK^T &= \begin{bmatrix} I & \eta C \\ -\eta C^T & I \end{bmatrix} \begin{bmatrix} I & -\eta C \\ \eta C^T & I \end{bmatrix} \\ &= \begin{bmatrix} I + \eta^2 CC^T & 0 \\ 0 & I + \eta^2 C^T C \end{bmatrix}. \end{aligned}$$

It is clear that the singular values of  $K$ , denoted by  $\sigma_i(K)$  is sandwiched between

$$\sqrt{1 + \eta^2\lambda_{\min}(CC^T)} \leq \sigma_i(K) \leq \sqrt{1 + \eta^2\lambda_{\max}(CC^T)}.$$

If we choose  $\eta = \frac{1}{\sqrt{\lambda_{\max}(CC^T)}}$ , then

$$0 \leq \eta^2\lambda_{\min}(CC^T) \leq \frac{\lambda_{\min}(CC^T)}{\lambda_{\max}(CC^T)} \leq 1.$$

Using the fact that for all  $0 \leq t \leq 1$ ,  $1 + (\sqrt{2} - 1)t \leq \sqrt{1 + t}$ , then

$$\sigma_{\min}(K) \geq \sqrt{1 + \eta^2\lambda_{\min}(CC^T)} \geq 1 + (\sqrt{2} - 1) \frac{\lambda_{\min}(CC^T)}{\lambda_{\max}(CC^T)}.$$

Recall Eqn. (22), using the fact for all  $0 \leq t \leq 1$ ,  $1/(1 + (\sqrt{2} - 1)t) \leq 1 - (1 - 1/\sqrt{2})t$ , we know

$$\begin{aligned} \sigma_{\min}(K) \cdot \left\| \begin{bmatrix} \theta_{t+1} \\ \omega_{t+1} \end{bmatrix} \right\| &\leq \left\| \begin{bmatrix} \theta_t \\ \omega_t \end{bmatrix} \right\| \\ \left\| \begin{bmatrix} \theta_{t+1} \\ \omega_{t+1} \end{bmatrix} \right\| &\leq \frac{1}{1 + (\sqrt{2} - 1) \frac{\lambda_{\min}(CC^T)}{\lambda_{\max}(CC^T)}} \left\| \begin{bmatrix} \theta_t \\ \omega_t \end{bmatrix} \right\| \\ &\leq \left( 1 - (1 - \frac{1}{\sqrt{2}}) \frac{\lambda_{\min}(CC^T)}{\lambda_{\max}(CC^T)} \right) \left\| \begin{bmatrix} \theta_t \\ \omega_t \end{bmatrix} \right\|. \end{aligned}$$

To sum up, when

$$T \geq \left\lceil (2 + \sqrt{2}) \frac{\lambda_{\max}(CC^T)}{\lambda_{\min}(CC^T)} \log \frac{r}{\epsilon} \right\rceil,$$

one can ensure  $\|(\theta_T, \omega_T)\| \leq \epsilon$ . □

*Proof of Theorem 4.* In the simple bi-linear game case,

$$\begin{aligned} \begin{bmatrix} \theta_{t+1} \\ \omega_{t+1} \end{bmatrix} &= \begin{bmatrix} \theta_t \\ \omega_t \end{bmatrix} - \begin{bmatrix} 0 & \eta C \\ -\eta C^T & 0 \end{bmatrix} \begin{bmatrix} \theta_{t+1/2} \\ \omega_{t+1/2} \end{bmatrix}, \\ &= \begin{bmatrix} \theta_t \\ \omega_t \end{bmatrix} - \begin{bmatrix} 0 & \eta C \\ -\eta C^T & 0 \end{bmatrix} \begin{bmatrix} I & -\gamma C \\ \gamma C^T & I \end{bmatrix} \begin{bmatrix} \theta_t \\ \omega_t \end{bmatrix}, \\ &= \begin{bmatrix} I - \eta\gamma CC^T & -\eta C \\ \eta C^T & I - \eta\gamma C^T C \end{bmatrix} \begin{bmatrix} \theta_t \\ \omega_t \end{bmatrix}. \end{aligned}$$

Note this linear system is the same as that in Thm. 6. Therefore the convergence analysis follows in the same way as Thm. 6. □
